# Supplementary figures and images for: Strategies for faster detachment of corneal cell sheet using micropatterned thermoresponsive matrices
Source: Royal Society of Chemistry journal article supplement (doi:10.1039/c5tb00350d), 2015-01-01

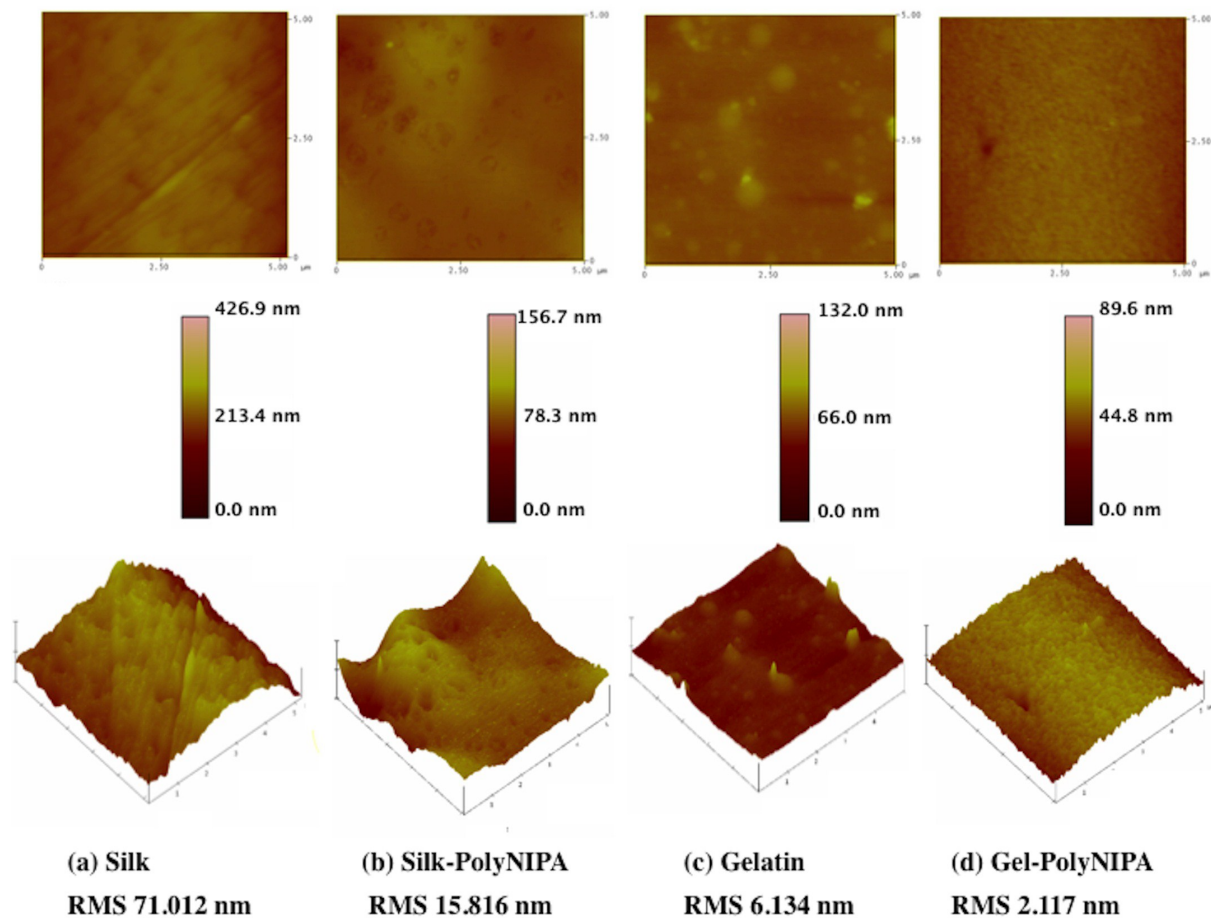

Supplement: c5tb00350d2.pdf [file c5tb00350d2.pdf]
